# Supplementary material for: A short ncRNA modulates gene expression and affects stress response and parasite differentiation in Leishmania braziliensis
Source: Front Cell Infect Microbiol. 2025 Feb 5;15:1513908. doi: 10.3389/fcimb.2025.1513908 (PMC11841412; doi:10.3389/fcimb.2025.1513908)
Supplement: Supplementary file 5 [file DataSheet5.xlsx]

## Sheet: SFig6
Supplementary Figure 6. Altered gene expression identified by transcriptomic analysis of parental and ncRNA97KO cells.
Gene ID		Description	baseMean	log2 FoldChange	FoldChange	Expr (%)	Up/dwon regulation	lfcSE	stat	pvalue	padj
UP-regulated	LBRM2903_350005300	Core histone H2A/H2B/H3/H4, putative	4159.29	2.71742	6.57697	657.697	6.57697	0.0717454	37.7116	0	0
	LBRM2903_260032300	hypothetical protein, conserved	412.732	0.735767	1.66528	166.528	1.66528	0.0970714	7.56587	3.85279e-14	5.9894e-12
	LBRM2903_320021700	DEAD/DEAH box helicase-like protein, putative	300.434	0.731754	1.66066	166.066	1.66066	0.115762	6.31341	2.72951e-10	2.51939e-08
	LBRM2903_310033300	hypothetical protein, conserved	245.503	0.672589	1.59393	159.393	1.59393	0.119516	5.6233	1.8734e-08	1.21169e-06
	LBRM2903_230029600	hypothetical protein, conserved	235.03	0.654676	1.57426	157.426	1.57426	0.121326	5.39487	6.85726e-08	3.70501e-06
	LBRM2903_310039500	hypothetical protein, conserved	770.823	0.618622	1.53541	153.541	1.53541	0.0979709	6.31124	2.76807e-10	2.52864e-08
	LBRM2903_310027600	Leucine Rich repeat, putative	369.972	0.614804	1.53135	153.135	1.53135	0.108605	5.65519	1.55674e-08	1.03717e-06
	LBRM2903_350022300	Kelch motif containing protein, putative	624.86	0.58212	1.49705	149.705	1.49705	0.0991733	5.86636	4.45472e-09	3.31708e-07
Down-regulated	LBRM2903_080014000	amastin-like protein	1444.06	-1.02997	0.489722	48.9722	2.04198	0.0741674	-13.8713	9.44997e-44	2.79121e-40
	LBRM2903_100024300	Amastin surface glycoprotein, putative	559.3	-0.900855	0.535569	53.5569	1.86717	0.0923691	-9.7315	2.21299e-22	9.77537e-20
	LBRM2903_080014300	hypothetical protein, conserved	10849.1	-0.888486	0.540181	54.0181	1.85123	0.0516724	-17.1928	3.00479e-66	1.33127e-62
	LBRM2903_080014200	hypothetical protein	1918.25	-0.824722	0.564591	56.4591	1.77119	0.0665136	-12.3926	2.86728e-35	5.0814e-32
	LBRM2903_000006000	Amastin surface glycoprotein, putative	5955.45	-0.789928	0.578373	57.8373	1.72899	0.0582527	-13.5584	7.06597e-42	1.56529e-38
	LBRM2903_080014100	hypothetical protein, conserved	1974.73	-0.764059	0.588837	58.8837	1.69826	0.0723372	-10.558	4.66371e-26	3.75683e-23
	LBRM2903_080015200	hypothetical protein, conserved	5245.65	-0.746487	0.596053	59.6053	1.6777	0.0732466	-10.1902	2.19387e-24	1.14352e-21
	LBRM2903_030011700	hypothetical protein	79.2206	-0.738644	0.599303	59.9303	1.66861	0.125144	-5.88455	3.99139e-09	3.02288e-07
	LBRM2903_080008500	ribonuclease mar1	1774.66	-0.72791	0.603778	60.3778	1.65624	0.0678597	-10.7219	8.03091e-27	7.11619e-24
	LBRM2903_080016600	stress-induced protein sti1	15731.2	-0.721488	0.606472	60.6472	1.64888	0.0699108	-10.3198	5.73391e-25	3.17551e-22
	LBRM2903_080018000	hypothetical protein, conserved	12287.6	-0.721298	0.606552	60.6552	1.64866	0.064415	-11.1971	4.21235e-29	4.14729e-26
	LBRM2903_080010000	DnaJ domain containing protein, putative	7988.5	-0.71151	0.610681	61.0681	1.63752	0.0674421	-10.5492	5.12499e-26	3.78438e-23
	LBRM2903_220007600	hypothetical protein, conserved	5403.97	-0.709571	0.611502	61.1502	1.63532	0.0597864	-11.8669	1.75856e-32	2.22608e-29
	LBRM2903_100024400	Amastin surface glycoprotein, putative	6302.74	-0.692092	0.618956	61.8956	1.61562	0.0785359	-8.81188	1.23069e-18	3.46131e-16
	LBRM2903_080008200	iron superoxide dismutase	8606.29	-0.677986	0.625037	62.5037	1.5999	0.0560574	-12.0936	1.1414e-33	1.68566e-30
	LBRM2903_080007400	hypothetical protein, conserved	2079.64	-0.677182	0.625385	62.5385	1.59901	0.0644006	-10.5117	7.63324e-26	5.20293e-23
	LBRM2903_080012100	hypothetical protein, conserved	3251.94	-0.675453	0.626136	62.6136	1.5971	0.0643705	-10.4911	9.48823e-26	6.00537e-23
	LBRM2903_200055700	amastin-like surface protein, putative	278.27	-0.6705	0.628289	62.8289	1.59163	0.10973	-6.0987	1.06938e-09	9.11131e-08
	LBRM2903_080011100	eukaryotic translation initiation factor 2 beta subunit, putative	6704.21	-0.661608	0.632173	63.2173	1.58184	0.0575128	-11.5026	1.27945e-30	1.41715e-27
	LBRM2903_000009500	Amastin surface glycoprotein, putative	2798.67	-0.659899	0.632922	63.2922	1.57997	0.0648012	-10.1812	2.40543e-24	1.18414e-21
	LBRM2903_080011700	ribose-phosphate pyrophosphokinase, putative	5188.88	-0.650002	0.63728	63.728	1.56917	0.0625781	-10.3859	2.87401e-25	1.69778e-22
	LBRM2903_080007000	hypothetical protein, conserved	1578.79	-0.643524	0.640147	64.0147	1.56214	0.072544	-8.86746	7.48313e-19	2.21027e-16
	LBRM2903_200018900	Amastin surface glycoprotein, putative	5538.87	-0.642022	0.640814	64.0814	1.56051	0.0686376	-9.35298	8.52162e-21	3.14625e-18
	LBRM2903_050018500	unspecified product	4408.22	-0.6341	0.644343	64.4343	1.55197	0.067914	-9.3357	1.00324e-20	3.41913e-18
	LBRM2903_080016500	hypothetical protein, conserved	23201.9	-0.630846	0.645797	64.5797	1.54847	0.0694516	-9.08315	1.05473e-19	3.46148e-17
	LBRM2903_170014100	protein kinase, putative	6585.87	-0.630215	0.64608	64.608	1.5478	0.077423	-8.13948	3.96988e-16	7.9948e-14
	LBRM2903_080007600	ABC1 family, putative	2815.3	-0.625796	0.648062	64.8062	1.54306	0.0669883	-9.34005	9.62914e-21	3.41295e-18
	LBRM2903_080012400	signal peptidase type I, putative	3374.75	-0.625182	0.648338	64.8338	1.54241	0.0790777	-7.90494	2.68052e-15	4.65728e-13
	LBRM2903_080017300	hypothetical protein, conserved	1446.63	-0.622997	0.649321	64.9321	1.54007	0.0798969	-7.79479	6.45132e-15	1.09933e-12
	LBRM2903_080015900	cathepsin L-like protease	9148.17	-0.611542	0.654497	65.4497	1.52789	0.0617048	-9.91027	3.75617e-23	1.75176e-20
	LBRM2903_080016100	hypothetical protein	3205	-0.602133	0.658779	65.8779	1.51796	0.0669843	-8.9878	2.52231e-19	7.98222e-17
	LBRM2903_080005900	phosphoglycerate mutase protein, putative	990.756	-0.600675	0.659445	65.9445	1.51643	0.0808079	-7.42948	1.09025e-13	1.55818e-11
	LBRM2903_000005900	Amastin surface glycoprotein, putative	262.443	-0.600312	0.659611	65.9611	1.51604	0.112219	-5.34123	9.23201e-08	4.78391e-06
	LBRM2903_080008100	ribosomal protein L2, putative	6565.71	-0.599542	0.659963	65.9963	1.51524	0.0632113	-9.48405	2.446e-21	9.85181e-19
	LBRM2903_080015100	hypothetical protein, conserved	2146.17	-0.585875	0.666245	66.6245	1.50095	0.0776885	-7.53984	4.70538e-14	7.18868e-12
	LBRM2903_200035100	amastin-like surface protein, putative	391.507	-0.582019	0.668028	66.8028	1.49694	0.100875	-5.76302	8.26208e-09	5.76459e-07
	LBRM2903_080008400	Isochorismatase family, putative	1570.43	-0.580859	0.668565	66.8565	1.49574	0.0708104	-8.20049	2.39417e-16	4.93367e-14
